# Supplementary material for: Graphene Nanoplatelets-Based Textured Polymeric Fibrous Fabrics for the Next-Generation Devices
Source: MDPI journal article supplement (doi:10.3390/polym14245415), 2022-12-10
Supplement: s1 [file s1]

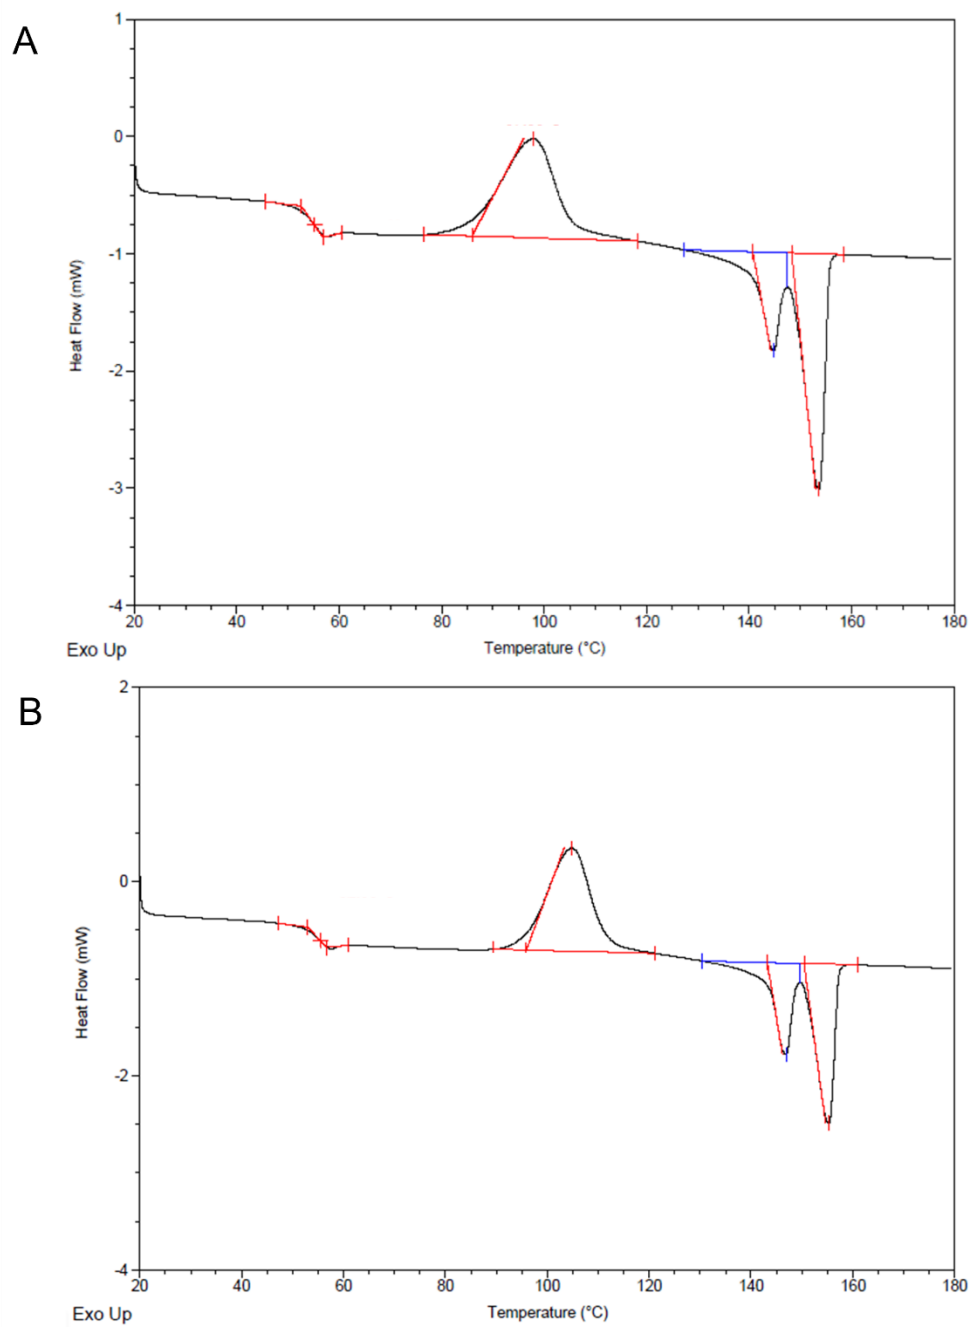

**Figure S1.** Representative second heating thermographs for PLA-nCD (A) and PLA (B) at the heating rate of 2 K/min.

A

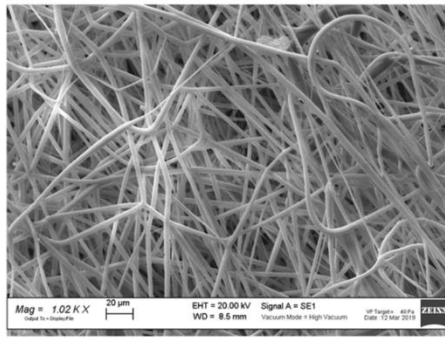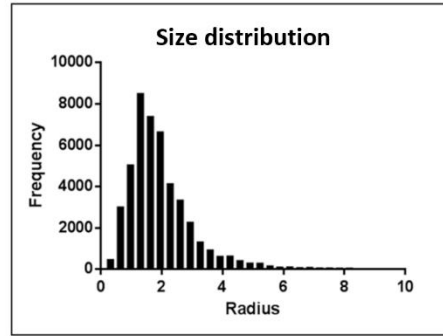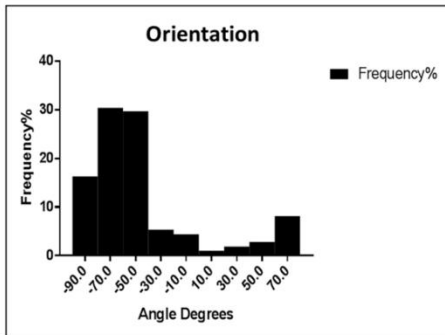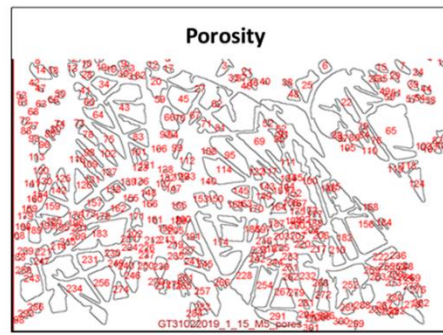

B

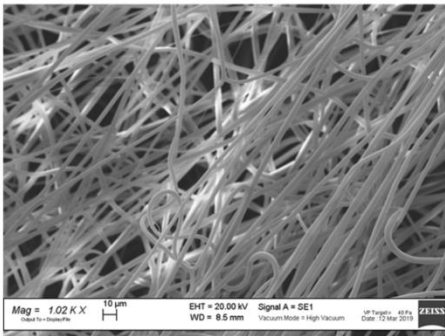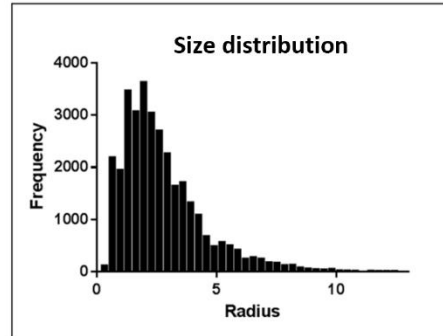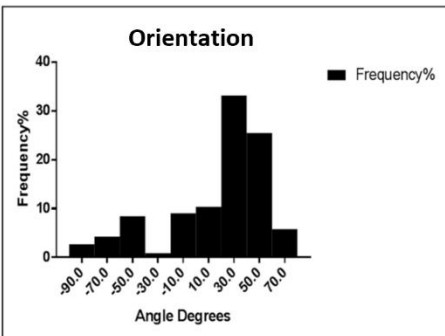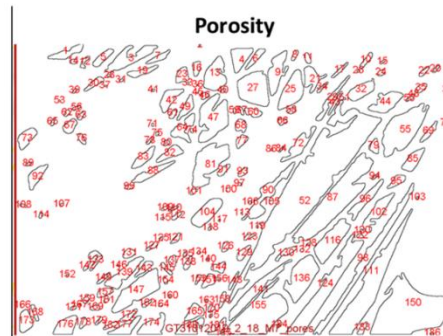

C

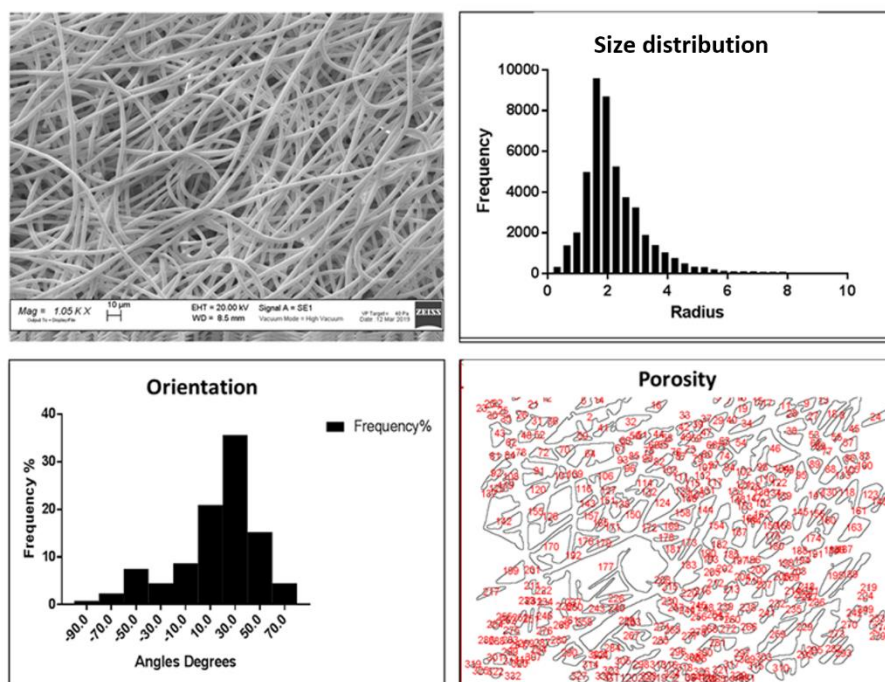

D

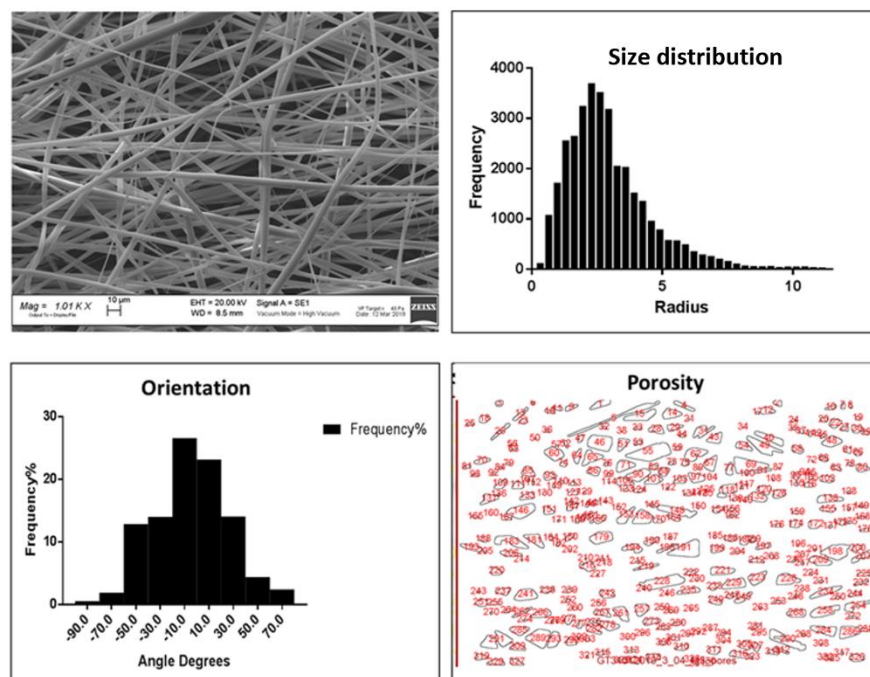

**Figure S2.** Morphological examination of PLA matrices obtained by using MC as solvent. SEM images of electrospun matrices (1 KX of magnification, scale bar=10 µm): (A) F-PLA, (B) R-PLA, (C) S-PLA, (D) D-PLA.

Images software elaboration leads to the evaluation of fiber size distribution, fiber orientation frequency and mat porosity.

A

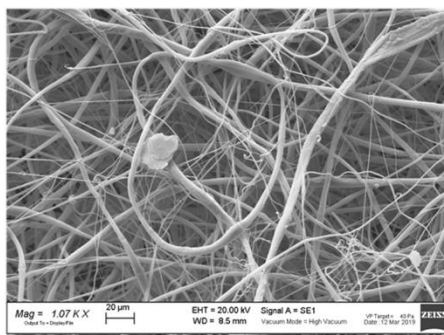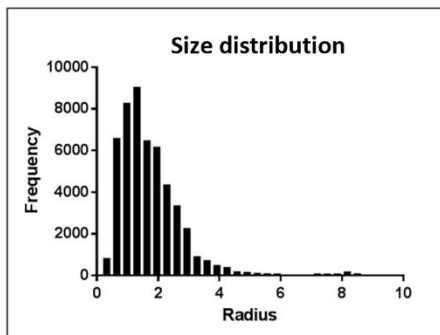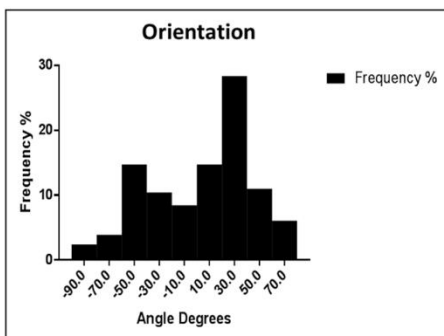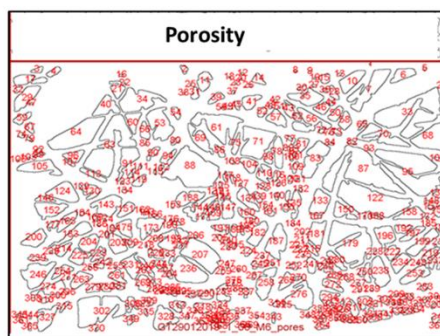

B

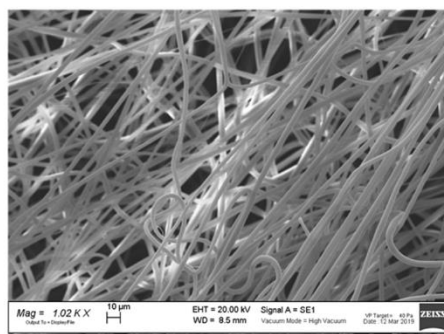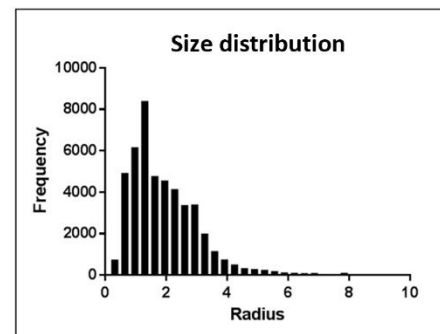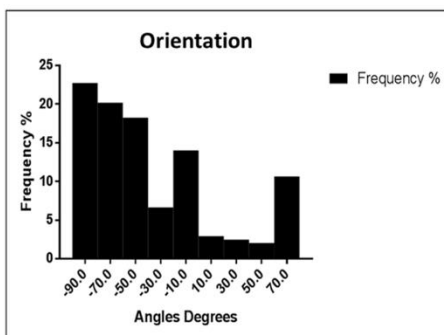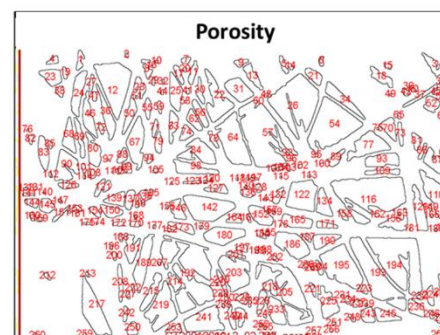



C

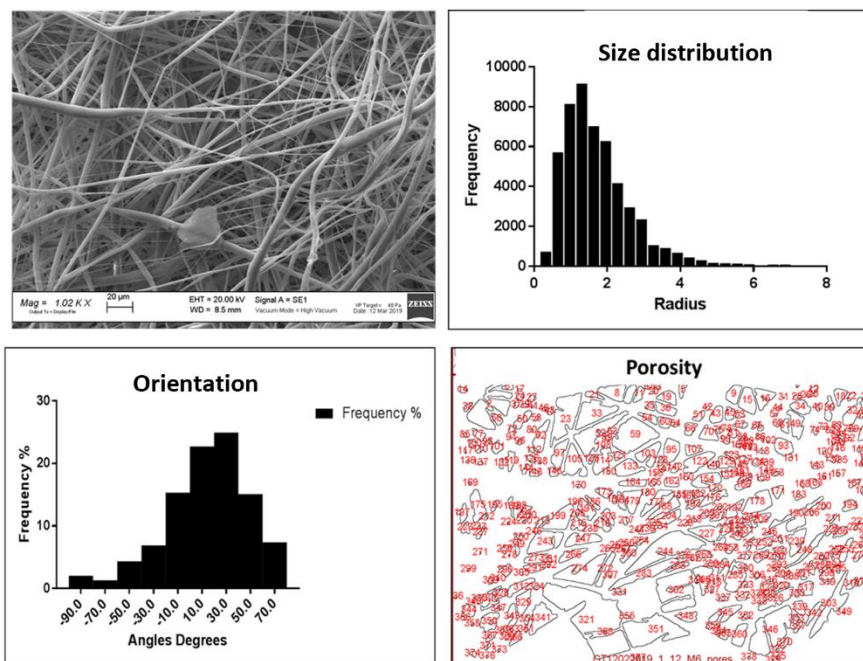

D

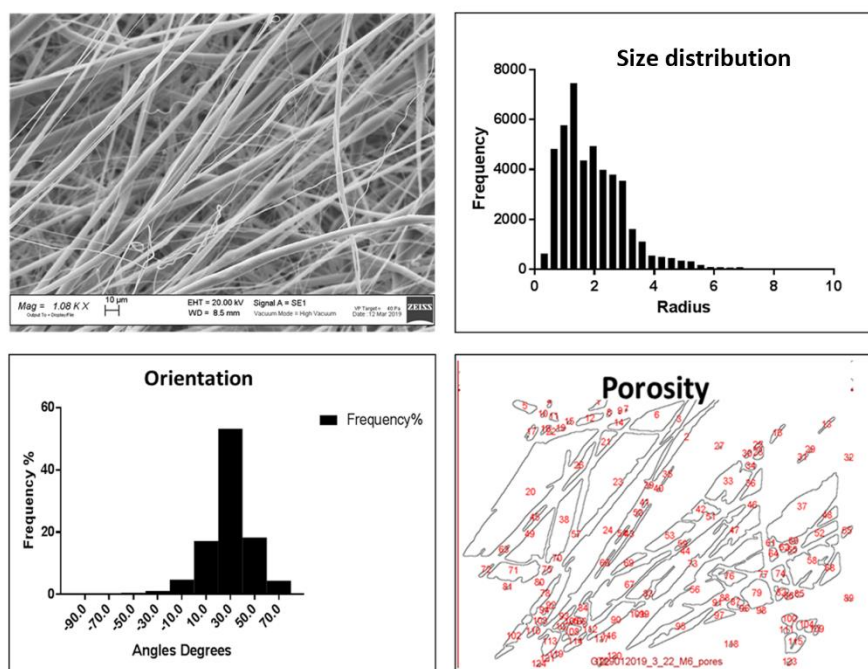

**Figure S3.** Morphological examination of PLA-nCD matrices obtained by using MC as solvent. SEM images of electrospun matrices (1 KX of magnification, scale bar=10  $\mu$ m):(A) F-PLA-nCD, (B) R-PLA-nCD, (C) S-PLA-, (D) D-PLA. Images software elaboration leads to the evaluation of fiber size distribution, fiber orientation frequency and mat porosity.

A

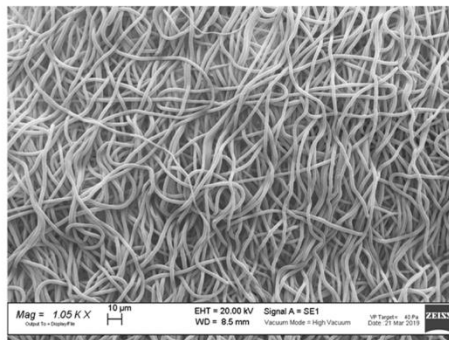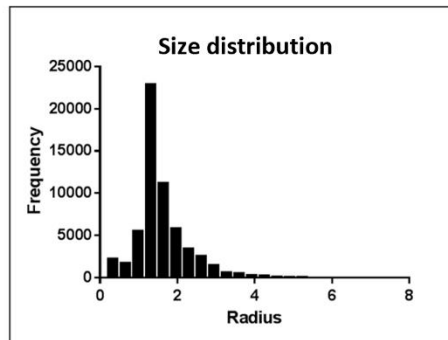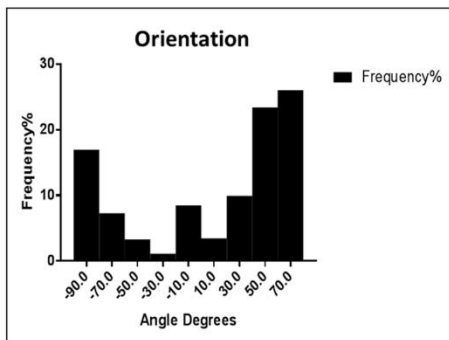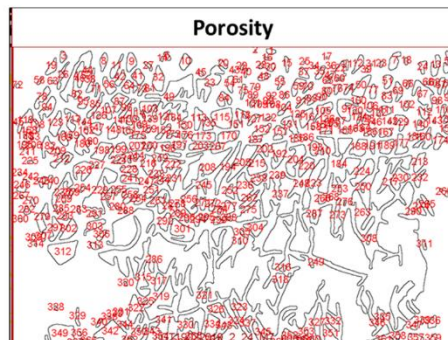

B

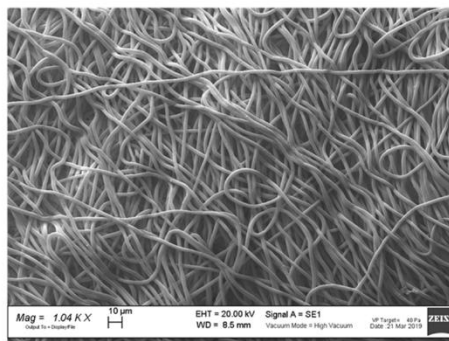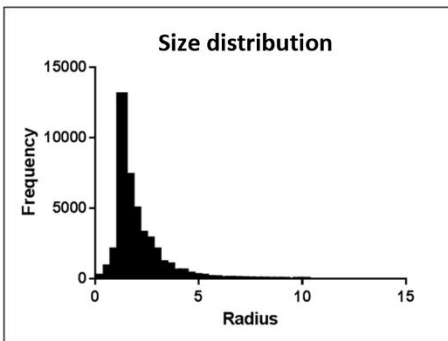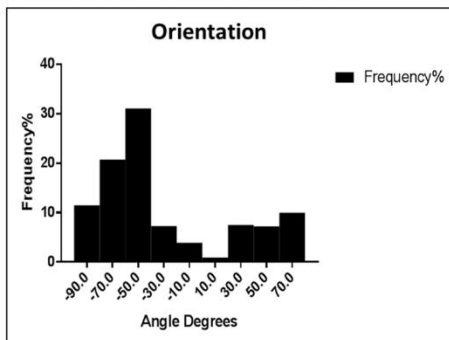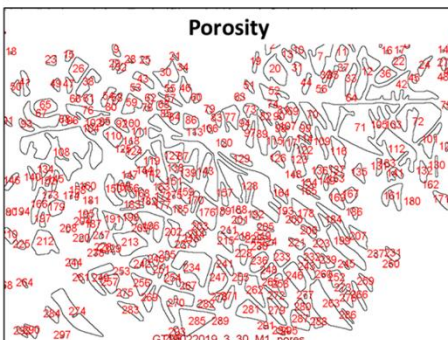

C

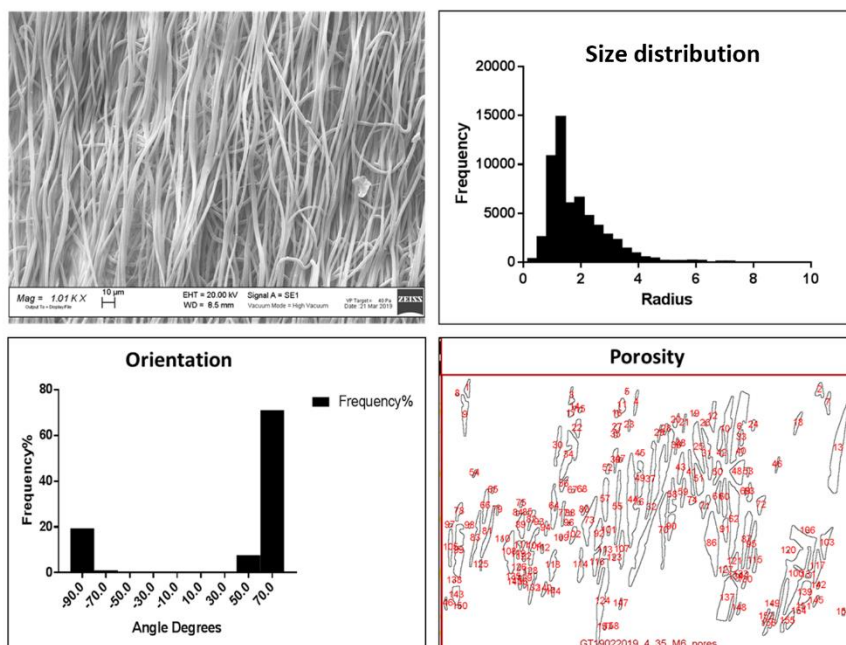

D

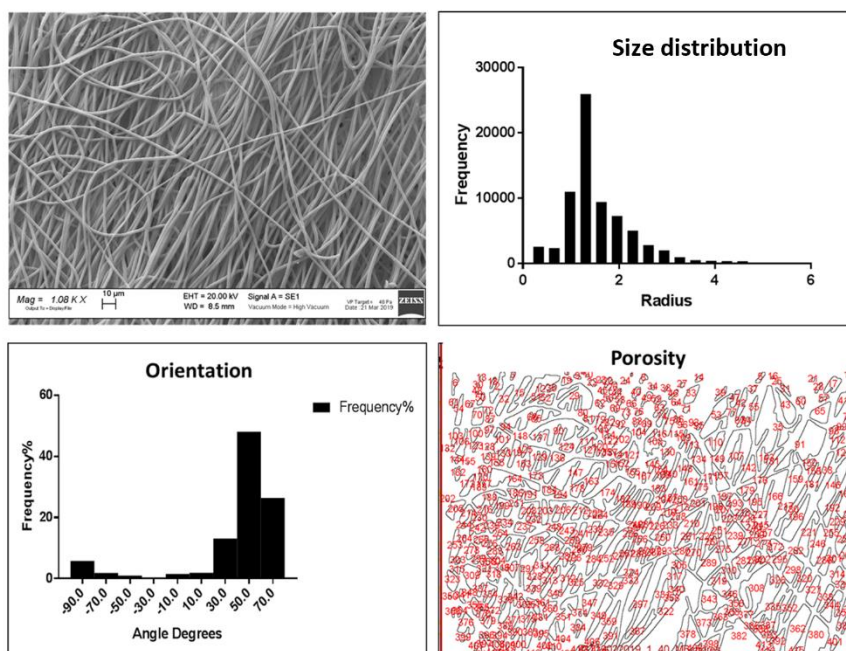

**Figure S4.** Morphological examination of PLA matrices obtained by using MC:DMF as solvent. SEM images of electrospun matrices (1 KX of magnification, scale bar=10 µm): (A) F-PLA, (B) R-PLA, (C) S-PLA, (D) D-PLA.

Images software elaboration leads to the evaluation of fiber size distribution, fiber orientation frequency and mat porosity.



A

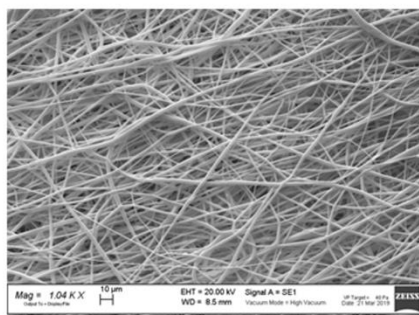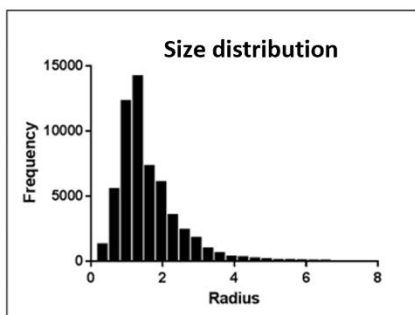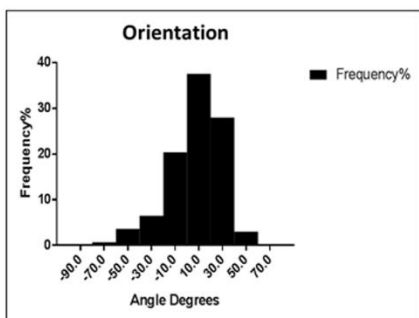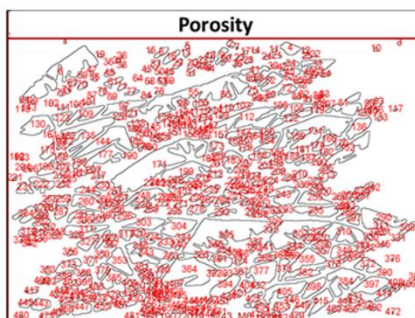

B

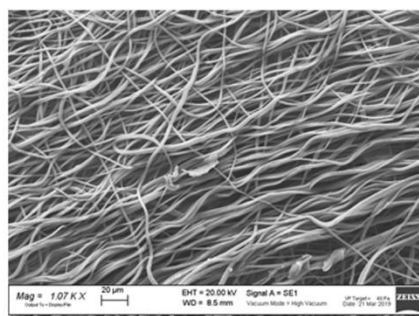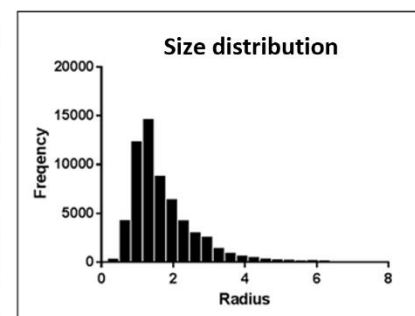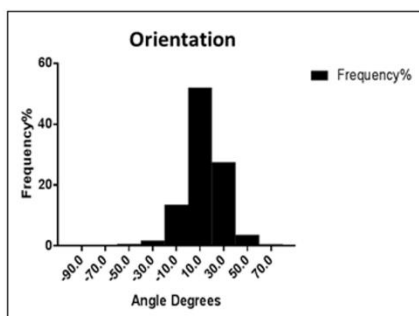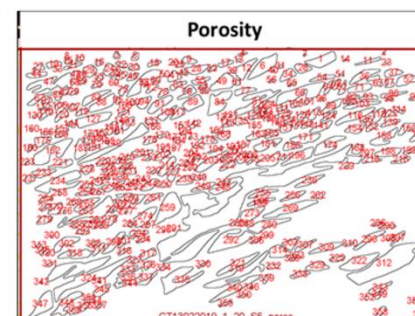



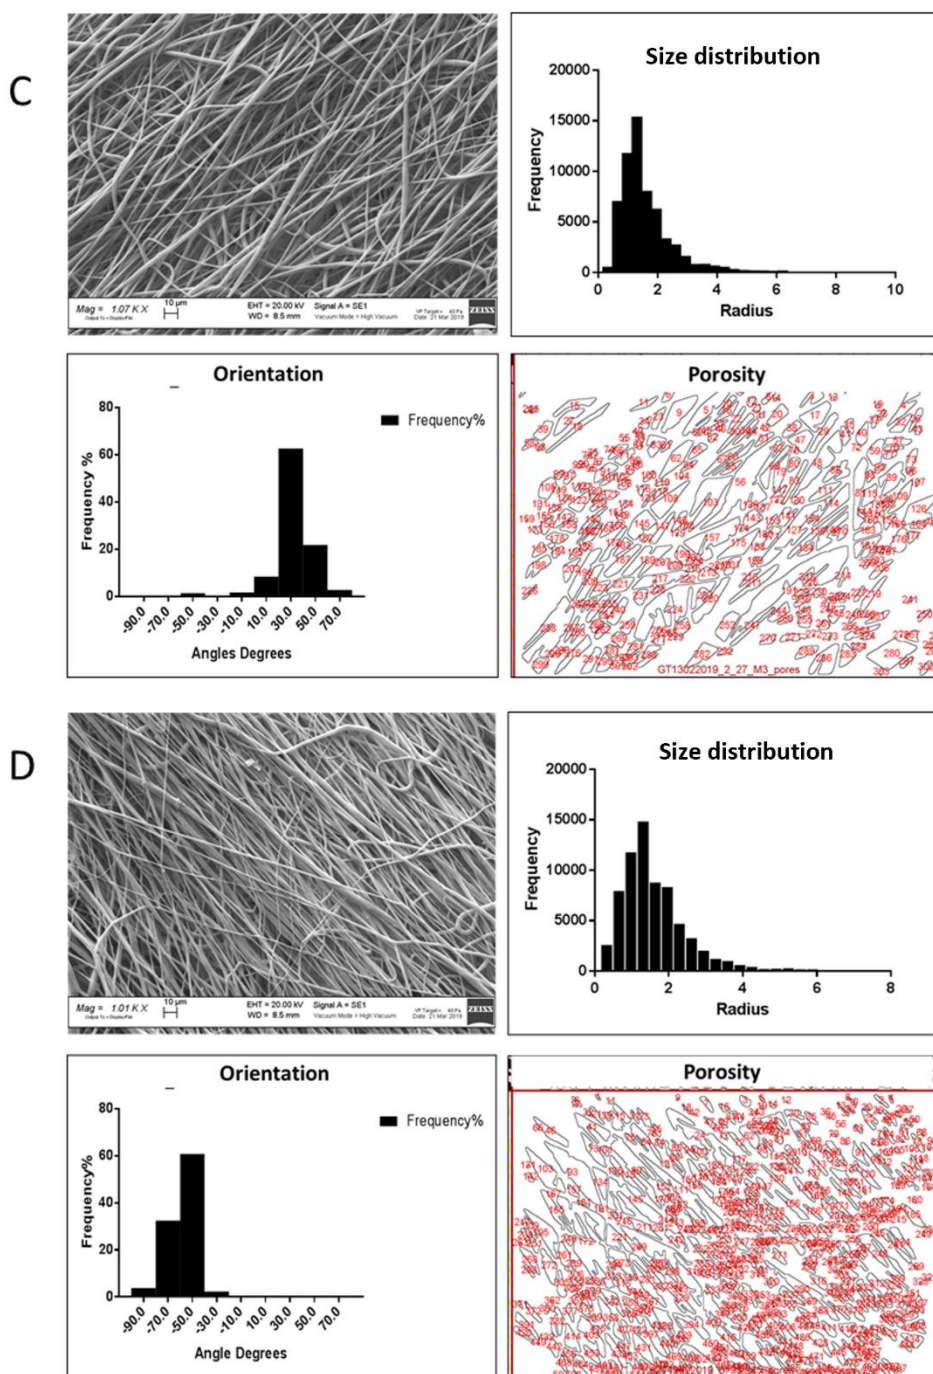

**Figure S5.** Morphological examination of PLA-nCD matrices obtained by using MC:DMF as solvent. SEM images of electrospun matrices (1 KX of magnification, scale bar=10  $\mu$ m): (A) F-PLA-nCD, (B) R-PLA-nCD, (C) S-PLA-nCD, (D) D-PLA-nC.

Images software elaboration leads to the evaluation of fiber size distribution, fiber orientation frequency and mat porosity.
